# Supplementary material
Source: PubMed Central journal article supplement (PMC2043555)

## Supplemental Figure 1.

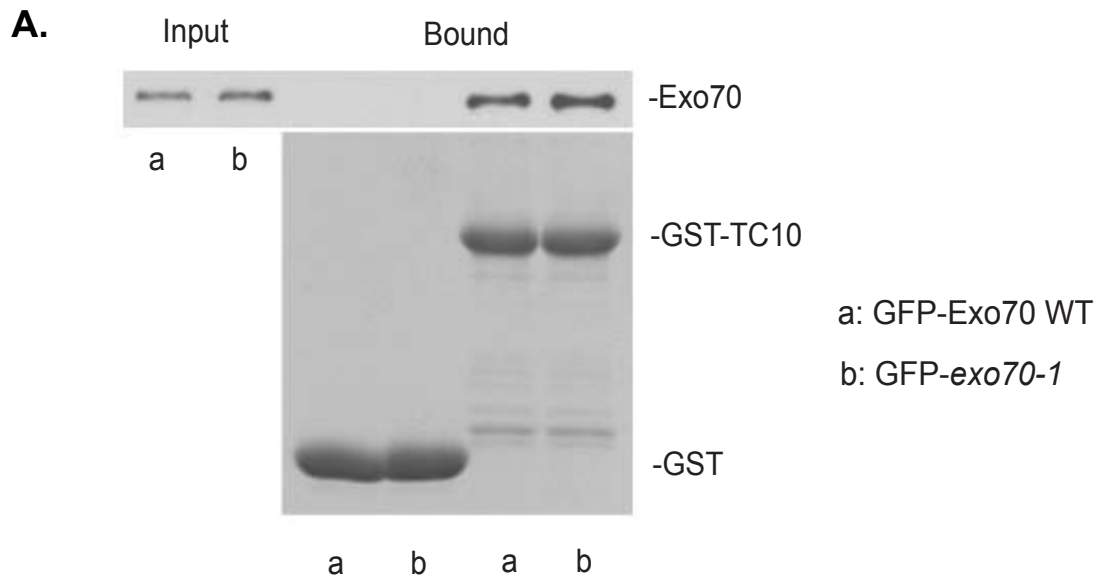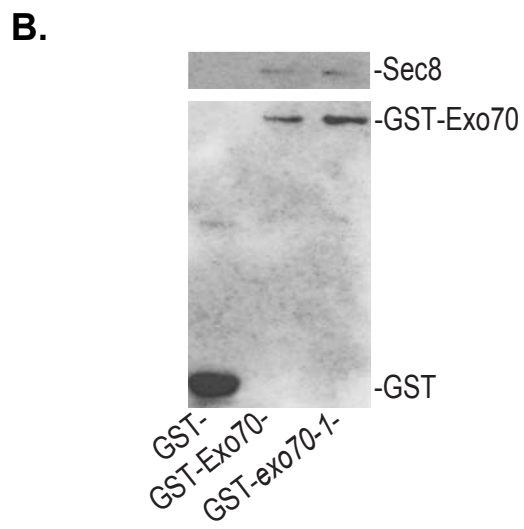

Supplement: mbc_E07-05-0461_1.pdf [file mbc_E07-05-0461_1.pdf]
